# Supplementary material
Source: PubMed Central journal article supplement (PMC4717834)
Supplement: NIHMS739990-supplement-1.pdf [file NIHMS739990-supplement-1.pdf]

**Supplemental Table 1. Mouse diet calorie and nutrient content.**

| <b>Calorie Content</b>         | <b>Lean</b> | <b>High<br/>Carbohydrate</b> | <b>High<br/>Fat</b> |
|--------------------------------|-------------|------------------------------|---------------------|
| <b>Protein (% energy)</b>      | 28.8        | 18.0                         | 18.1                |
| <b>Fat (% energy)</b>          | 12.7        | 10.2                         | 61.6                |
| <b>Carbohydrate (% energy)</b> | 58.5        | 71.8                         | 20.3                |
| <b>Energy (kcal/g)</b>         | 3.08        | 3.80                         | 5.10                |
