# Supplementary material
Source: PubMed Central journal article supplement (PMC4717834)

Supplemental Figure 3

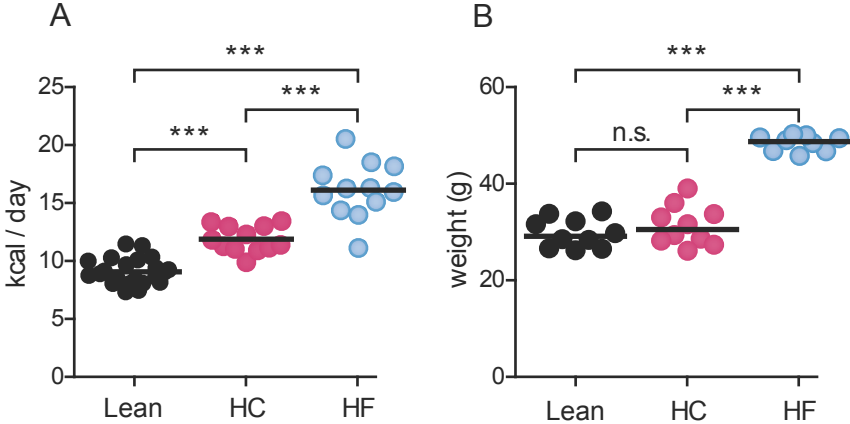

Supplement: NIHMS739990-supplement-4.pdf [file NIHMS739990-supplement-4.pdf]
